# Supplementary material for: HighResNPS.com: An Online Crowd-Sourced HR-MS Database for Suspect and Non-targeted Screening of New Psychoactive Substances
Source: Oxford University Press journal article supplement (doi:10.1093/jat/bkz030), 2019-04-05
Supplement: bkz030_jat-19-2772-file002.doc [file bkz030_jat-19-2772-file002.doc]

**Supplementary material**

**Instructions for importing HighResNPS into Agilent Mass Hunter Quant software:**

1. **Create python Script file. ( .py file)**

The script text is provided on page 2. Copy and paste text to an empty .txt file and rename file with a .py extension- for example 'CreateMethodFromCSV.py'

1. **Enable your PC to use Python Scripts**

The PC will need to be able to process Python scripts. If the scripting step does not proceed install a program to enable Python scripts to run (eg Iron Python [**https://github.com/IronLanguages/main/releases/tag/ipy-2.7.7**](https://github.com/IronLanguages/main/releases/tag/ipy-2.7.7).)

1. **Using the Script via Mass Hunter Quant (B.09)**

- Download HighResNPS in Excel format (select period format, not commas at the top). Use Excel filters to remove entries without fragment masses.
- Save the file in .csv format. for example 'HighResNPS import.csv'
- Open Mass Hunter Quant (for TOF) (Quant B.09 Build 9.0.647.0)
- Create a new batch
- Add samples (All Ions data from an LC-QTOF)
- Select ‘New Method using Manual Setup’
- Select Tools->Actions->Custom Action
- Select the script 'CreateMethodFromCSV.py' and when prompted navigate to 'HighResNPS import.csv'
- The method will be populated with names, formulae, parent masses and qualifier massesNote 1 .
- After all cpds and qualifiers are imported, use the fill down feature to set the following for all: Note 1
  - RT =midpoint of the run (e.g. 6 min)
  - RT delta=+/- 0.5*midpoint (e.g. 6 min)
  - RTWindow=runtime (e.g 12 min)
  - EIC width appropriate to instrument capability (eg 0.020 Thompsons)
- Select outlier settings to assist in narrowing the number of hits to a manageable level.
  - Outlier settings accurate massNote 2 (eg ±0.005 Thompsons)
  - mass accuracy score (Isotopic pattern)Note 3 (eg 50%)
  - co-elution score (eg 50%).

Use settings appropriate to instrument capability and application. These can be used to sort data in Compounds-at-a-Glance, so that you can remove compounds that do not satisfy the outlier requirements.

**Notes:**

1. Due to the large size of the database and resulting method entries, understandably, some steps may take >10 minutes. However, subsequent updates to the method compound list can be limited to only new additions to HighResNPS which minimises the time taken for each step.
2. At time of writing, in order to activate mass accuracy calculations in Quant B.09, it is necessary to create a dummy calibration curve by creating a single calibration level (concentration=1, force through zero) , copying calibration level to all compounds and applying the method to a batch, then setting any sample as a calibrator before analysing. This will only need to be done once for that method.
3. In order to use the Mass Match Score (isotopic pattern scoring) feature, it is necessary to first create a “Reference Pattern Library”(Method->Setup Reference Pattern Library). Then add this library to the method in Method Setup Tasks->Globals Setup-> Reference Pattern Library.

*Author PS would like to thank Agilent Technologies' James Pyke (Santa Clara, USA and Melbourne, Australia) for his expertise, time and genuine enthusiasm for this work, and Li Sun (Santa Clara USA) for the script. If you have problems or feedback, please contact author peter.stockhamATsa.gov.au as a first option.*

# Description: Create Quant Method from CSV file

import sys

sys.path.append(r'C:\Program Files (x86)\IronPython 2.7\Lib')

import System

import System.Text

import System.IO

import System.Windows

import Agilent

import array

from System import Array

import clr

import csv

clr.AddReference("AppCommandContext")

clr.AddReference("QuantUIScriptIF")

clr.AddReference("QuantUIScriptIFImpls")

clr.AddReference("System.Windows.Forms")

from System.Windows.Forms import OpenFileDialog, DialogResult

def FindUniqueCompoundID():

for i in range(0, System.Int16.MaxValue ):

if MethodDataSet.TargetCompoundTable.Select(System.String.Format("CompoundID = {0}", i)).Count==0:

return i

try:

#------------------------------------------------

# Check if method editing mode

#------------------------------------------------

if( not UIState.EditingMethod ):

UIState.ShowMessage(

"Please run this script from Method Editor.",

None,

System.Windows.Forms.MessageBoxButtons.OK,

System.Windows.Forms.MessageBoxIcon.Error)

sys.exit()

dialog = OpenFileDialog()

dialog.Filter = "CSV files (*.csv)|*.csv"

if dialog.ShowDialog(UIState.MainFrame) == DialogResult.OK:

f = dialog.FileName

with open(f) as csvfile:

reader = csv.DictReader(csvfile)

for row in reader:

id = row['ID']

compoundName = row['Compound'] #CompoundName

compoundType = "Target" #CompoundType default to Target

rt = 0 if row['RT'] in (None, "") else float(row['RT']) #RetentionTime

formula = row['PMF'] #MolecularFormula

pmass = 0 if row['Pmass'] in (None, "") else float(row['Pmass']) #QuantifierIon

fmass1 = 0 if row['F1mass'] in (None, "") else float(row['F1mass']) #QualifierIon1

fmass2 = 0 if row['F2mass'] in (None, "") else float(row['F2mass']) #QualifierIon2

fmass3 = 0 if row['F3mass'] in (None, "") else float(row['F3mass']) #QualifierIon3

cid = FindUniqueCompoundID()

quantifierIonParamArray = Array[Agilent.MassSpectrometry.DataAnalysis.Quantitative.NameValue]([Agilent.MassSpectrometry.DataAnalysis.Quantitative.NameValue("CompoundName", compoundName), \

Agilent.MassSpectrometry.DataAnalysis.Quantitative.NameValue("RetentionTime", rt), \

Agilent.MassSpectrometry.DataAnalysis.Quantitative.NameValue("MZ", pmass),\

Agilent.MassSpectrometry.DataAnalysis.Quantitative.NameValue("MolecularFormula", formula),\

Agilent.MassSpectrometry.DataAnalysis.Quantitative.NameValue("CompoundType", compoundType)])

cmd = _commands.QuantAddMethodTargetCompound(cid, quantifierIonParamArray)

if(fmass1 !=0):

qualifierIonParamArray1 = Array[Agilent.MassSpectrometry.DataAnalysis.Quantitative.NameValue]([Agilent.MassSpectrometry.DataAnalysis.Quantitative.NameValue("MZ", fmass1)])

_commands.QuantAddMethodTargetQualifier(cid, qualifierIonParamArray1)

if(fmass2!=0):

qualifierIonParamArray2 = Array[Agilent.MassSpectrometry.DataAnalysis.Quantitative.NameValue]([Agilent.MassSpectrometry.DataAnalysis.Quantitative.NameValue("MZ", fmass2)])

_commands.QuantAddMethodTargetQualifier(cid, qualifierIonParamArray2)

if(fmass3!=0):

qualifierIonParamArray3 = Array[Agilent.MassSpectrometry.DataAnalysis.Quantitative.NameValue]([Agilent.MassSpectrometry.DataAnalysis.Quantitative.NameValue("MZ", fmass3)])

_commands.QuantAddMethodTargetQualifier(cid, qualifierIonParamArray3)

except SystemExit:

pass
